1  
2  
3  
4  
5  
6  
7  
8  
9  
10  
11  
12  
13  
14  
15  
16  
17  
18  
19  
20  
21  
22  
23

**Magnitude of work-related musculoskeletal disorders and ergonomic risk practices among medical laboratory professionals in Northwest Ethiopia: A cross-sectional study.**

Mekuriaw Temeche Alibsew<sup>1,2</sup> Habtamu Molla<sup>2</sup>, Melashu Balew Shiferaw<sup>3</sup>, Abay Sisay Misganaw<sup>2,\*</sup>

<sup>1</sup>*Department of medical laboratory Sciences, college of medicine and health science, Bahir Dar University, Bahir Dar, Ethiopia mekuht@gmail.com, Tel +251948015174*

<sup>2</sup>*Department of Medical Laboratory Sciences, College of Health Sciences, Addis Ababa University, Addis Ababa, Ethiopia*

<sup>3</sup>*Research and Technology Transfer Directorate, Amhara Public Health Institute, Bahir Dar, Ethiopia*

\*Correspondence: Abay Sisay Misganaw, POBox- 1176 Addis Ababa, E-mail abay.sisay@aau.edu.et, Tel +251911547032

**Keywords:** Ergonomics, Medical laboratory professionals, musculoskeletal disorders, risk practices

Total word count=6500

24 **Abstract**

25 **Objective:** This study aimed to assess the magnitude of work-related musculoskeletal disorders  
26 (WMSDs) and ergonomic risk practices among medical laboratory professionals in North West  
27 Ethiopia.

28 **Design:** Facility-based cross-sectional study

29 **Methods:** Cross-sectional study design was employed among medical laboratory professionals  
30 (MLPs). The Nordic musculoskeletal questionnaire was adopted and used. In addition to  
31 questionnaires about socio-demographic characteristics and ergonomic risk practice, one-to-one  
32 interviews, and a direct observational checklist were used. Data was entered into Epi Data 3.1  
33 and then exported and analyzed using SPSS version 25.0. Logistic regression analysis was used  
34 to estimate the 95% CI (AOR) at a cut-off value of  $p < 0.05$  for statistically significant tests.

35 **Results:** A total of 238 MLPs participated in the study. The magnitude of WMSDs was  
36 116(48.7%). The most affected body parts were the lower back (20.6%) and wrists (16.4%). The  
37 magnitude of WMSDs among government-owned hospitals was the highest (56.4%). 67.6%  
38 MLPs never heard about ergonomics. The general mean score of workstations was 2.28.  
39 Ergonomic risk practices like repetitive movement and doing of high workload were  
40 significantly associated with WMSDs.

41 **Conclusion:** The current findings revealed a high magnitude of WMSDs that strongly need  
42 applying preventive action before body symptoms developed. Improving and renovating  
43 workplace design and enhancing awareness of MLPs were the necessary measures to control  
44 ergonomic risk factors.

45

46

## 47 **Introduction**

48 Musculoskeletal disorders (MSDs) are injuries of the muscles, nerves, tendons, joints, cartilage,  
49 and spinal discs.<sup>1</sup> The main risk factors for MSDs development among MLPs are ill-structured  
50 jobs, poor posture at work, poor workstation design, prolonged working time, and repetitive  
51 movements.<sup>2</sup> Differently, routine laboratory examination needs procedures such as pipetting,  
52 working at microscopes, and operating microtomes that requires repetitive motion, which is  
53 risky.<sup>3</sup>

54 A work setting causes workplace risk factors for MSDs such as shoulder and backache, joint pain  
55 and muscle fatigue, this suffering mainly lies on health care professionals comprising MLPs.<sup>4</sup>  
56 Particularly, medical laboratory technicians have high a magnitude of WMSDs and the major  
57 affected areas were neck, shoulder, elbow, and hand.<sup>5</sup> Hence, the magnitude of WMSDs among  
58 MLPs is high which ranging from 40 to 60%.<sup>6</sup>

59 One of the pertinent causes for increased risk of WMSDs development among MLPs is the lack  
60 of application of ergonomic principle.<sup>2</sup> Prolonged exposure to ergonomic risk factors can also  
61 cause damage to a worker's body and lead to WMSDs.<sup>7</sup> Nevertheless, there are limited studies  
62 about ergonomic hazards that ultimately lead to musculoskeletal problems among MLPs in  
63 Ethiopia.

64 This study aimed to assess the magnitude of work-related musculoskeletal disorders (WMSDs)  
65 and ergonomic risk practice among MLPs working in Bahirdar, Northwest Ethiopia from  
66 February 1, 2021 to June 30, 2021. We hypothesized that there is no significant association  
67 between the occurrence of WMSDs and ergonomic risk practice among MLPs in Northwest  
68 Ethiopia.

## 69 **Methods**

### 70 **Study design and Setting**

71 Cross-sectional study was conducted to assess the magnitude of WMSDs and ergonomic  
72 risk practice among medical laboratory professionals of Bahirdar, Northwest Ethiopia by  
73 incorporating the quantitative and direct observational techniques were used from February 1,  
74 2020 to June 30, 2021. Bahirdar city had three government owned hospitals and four private

75 owned hospitals in addition ten government owned health centres. Ten private owned clinics also  
76 included in the study. Furthermore, the city had Amhara public health institute (APHI)  
77 accredited by the Ethiopian National Accreditation Office (ENAO) in all laboratory tests since  
78 2018G.C in accordance with the ISO 15189:2012 standard. <sup>8</sup> According to the health and health  
79 indicators of Amhara regional state health bureau, the number of MLPs in the city is 264.

## 80 **Sample size and sampling techniques**

81 All MLPs who were working in health facilities of Bahirdar that fulfils the inclusion criteria  
82 were taken as study subject. Thus, no need of sample size calculation for the determination of the  
83 study variables. Accordingly, two hundred thirty eight (238) MLPs working in health facilities of  
84 Bahirdar city were included in the study. Totally 27 health facilities medical laboratory  
85 departments were assessed. One hundred fifty six workstations that laboratory staffs were on  
86 work during data collection moment were selected purposively. The health facilities were  
87 selected using purposively by taking all the health facilities having laboratory service during the  
88 study period. Census sampling technique employed for those MLPs who actively engaged in the  
89 laboratory diagnosis of government and private owned health facilities as well as and who had  
90 fixed working hours.

## 91 **Data collection**

92 The questionnaires, checklists and interviews, data collection tools were interrelated to assess the  
93 magnitude about association of WMSDs and ergonomic risk practices among MLPs. The  
94 questionnaires were consists of socio-demographic characteristics, and pain and discomfort.  
95 Nordic Musculoskeletal questionnaire which is Nordic measurement that divides human body  
96 into nine body regions, which may affect by WMSDs, institutional factors, and workplace  
97 factors. <sup>9, 10</sup> Direct observational checklist was used to determine the condition of standing  
98 bench, sitting bench, computer, pipetting, microscope, and chair and micromanipulation  
99 workstations. Moreover, tools like Paper, pencil, a folding rule, and a camera was used for  
100 workplace observations and for identification of ergonomic hazards using PLIBEL checklist. <sup>10</sup>  
101 One to one interviews using semi-structured questions with all medical laboratory managers  
102 were carried out. This data collection tools were pretested in Debretabor comprehensive  
103 specialized hospital.

## 104 **Data Quality Assurance**

105 The data quality was assured before, during and after the data collection. Before data collection,  
106 the questionnaires were pre tested in Debretabor referral hospital to evaluate its clearness and  
107 applicability according to the objective of the study. After the data collection, the collected data  
108 was rechecked for its completeness and consistency by the supervisor and principal investigator.  
109 The completeness of the questionnaire and its clarity was mainly rechecking by principal  
110 investigator. Nordic musculoskeletal questionnaire had an anatomical diagram of nine body  
111 regions like neck, shoulder, upper and lower back, hands/wrists, arms, knee, thighs and feet to  
112 make easy for study participants on correctly identifying the presence of musculoskeletal  
113 symptoms.

## 114 **Patient and public involvement**

115 Neither patients nor the public were involved in the design of this study.

## 116 **Data analysis and interpretation**

117 The data was edited, coded, and double entered into SPSS (version 25, SPSS Inc., Chicago, IL,  
118 USA) for cleaning and analysis. Odds ratio with 95% confidence interval was used to measure  
119 the association between the independent variables with the dependent variables. Results were  
120 summarized in texts, frequency tables and graphs. The association between report of WMSDs  
121 and respondents' socio demographic and ergonomics risk practice data were checked by using  
122 the binary logistic regression analysis. In addition, chi-square assumption was checked. For  
123 statistically significant tests and to count in the last logistic model the cut off value was  $P < 0.25$ .  
124 In the two variables (bivariate) analysis, the crude OR (COR) of reports of WMSDs was  
125 estimated by covariates; all covariates were categorical. Furthermore, to clear confounders and to  
126 check for interactions, multiple logistic regression analysis was used to estimate the adjusted OR  
127 at a cut off value of  $p < 0.05$  for statistically significant using Hosmer and Lemeshow goodness  
128 of fit test.

## 129 **Medical laboratories Workstations**

130 Standard ruler was used to measure the selected workstation. The measured values (centimetres)  
131 were converted into suitable units (meter). At the selected workstation, direct observational data

132 was recorded while medical laboratory personnels were at work. Each workstation was evaluated  
133 using assessment checklist. <sup>10</sup> The collected data were summarized in texts and frequency tables.  
134 If the workstations had the item when assessed, then it was score “1” (representing “yes”).  
135 While, if the workstation had not the required item when assessed, then it was score (“0”  
136 representing “no”). Suboptimal conditions and risk of injury represented by “no” answers. The  
137 sum of all item score gives total score of workstation. The sum of all item scores was dividing  
138 the total score of workstation. The total score of each workstation was divided by the number of  
139 items checked; the final score was expressed as a percentage. <sup>11</sup>

#### 140 **Categorizing of medical laboratory workstations**

141 Workstations of medical laboratories was categorized according to the following components:  
142 the standard height of standing bench is 0.91m, the standard height of sitting bench is 0.76m,  
143 laboratory chairs, microscopes (in bacteriology, haematology, parasitology, and urine analysis),  
144 pipettes, micromanipulation (of vials, forceps, cap openers, and tube holders), miscellaneous  
145 (i.e., platforms, storage space, storage closets, bins, and racks), and computer workstation. <sup>11, 12</sup>

#### 146 **Oprational Definitions**

147 Work load: - the number of patients served in a day by one professional is greater than 35, it  
148 considered as loaded. <sup>13</sup>

149 Work related musculoskeletal disorders: - conditions when the immediate working environment  
150 intensifies injuries of muscles, nerves, tendons, joints, cartilage, and spinal discs for at least 2 to  
151 3 days during the last 12 months on any body parts. These symptoms often come along at the  
152 work and go away at the time of rest and symptoms continue after work ends. These symptoms  
153 often appear at work that disappears during rest and symptom continues after work ends. <sup>1, 14, 15</sup>

154  
155  
156  
157  
158  
159

160  
161  
162  
163  
164

## 165 **Results**

### 166 **Socio-demographic characteristics of the study participants**

167 Out of the 264 questionnaires distributed to health facilities of Bahirdar, 238(90%) complete  
168 questionnaires returned and the majority of them,139(58.4%) were from government owned  
169 health facility. The age of MLPs ranging from 20 to 58 years and the mean age was 30.81years  
170 with standard deviation = 5.704 years additionally, 197(82.8%) participants were in an age range  
171 of 20 to 35 years. The mean work experience was 7.77(SD=4.982) and 153(64.3%) professionals  
172 had a work experience of greater than 5 years in their medical laboratory work place (Table 1).

Table 1 Demographics of MLPs working in Bahirdar, Ethiopia, 2021(n=238)

| Variables                        | Category             | Frequency | %    |
|----------------------------------|----------------------|-----------|------|
| Status of health facilities      | Public hospital      | 139       | 58.4 |
|                                  | Public health center | 30        | 12.6 |
|                                  | Private hospital     | 38        | 16.0 |
|                                  | Private clinic       | 31        | 13.0 |
| Sex                              | Male                 | 147       | 59.7 |
|                                  | Female               | 91        | 38.2 |
| Age in years                     | 20-35                | 197       | 82.8 |
|                                  | 36-60                | 41        | 17.2 |
| Marital status                   | Single               | 135       | 56.7 |
|                                  | Married              | 97        | 40.8 |
|                                  | Divorced             | 6         | 2.5  |
| Educational status               | College diploma      | 96        | 40.3 |
|                                  | First degree         | 116       | 48.7 |
|                                  | Second degree        | 26        | 10.9 |
| Work experience                  | <5 years             | 86        | 35.7 |
|                                  | 5-15 years           | 137       | 57.6 |
|                                  | >15 years            | 16        | 6.7  |
| Monthly income in Ethiopian birr | <4501                | 58        | 24.4 |
|                                  | 4501-7501            | 127       | 53.4 |
|                                  | >7501                | 53        | 22.3 |

173 **Magnitude distribution of WMSDs among body parts of MLPs**

174 Over the past 12 months, about half 116(48.7%) of clinical laboratory staffs reported WMSDs at  
175 least one of the nine body parts, they reported 274 WMSDs and the most affected body parts  
176 were the lower back 49 (20.6%) (Figure 1).

177

178

179

180

181

182

183

184

185

186

187

188

189

190

191

192

193

194

195



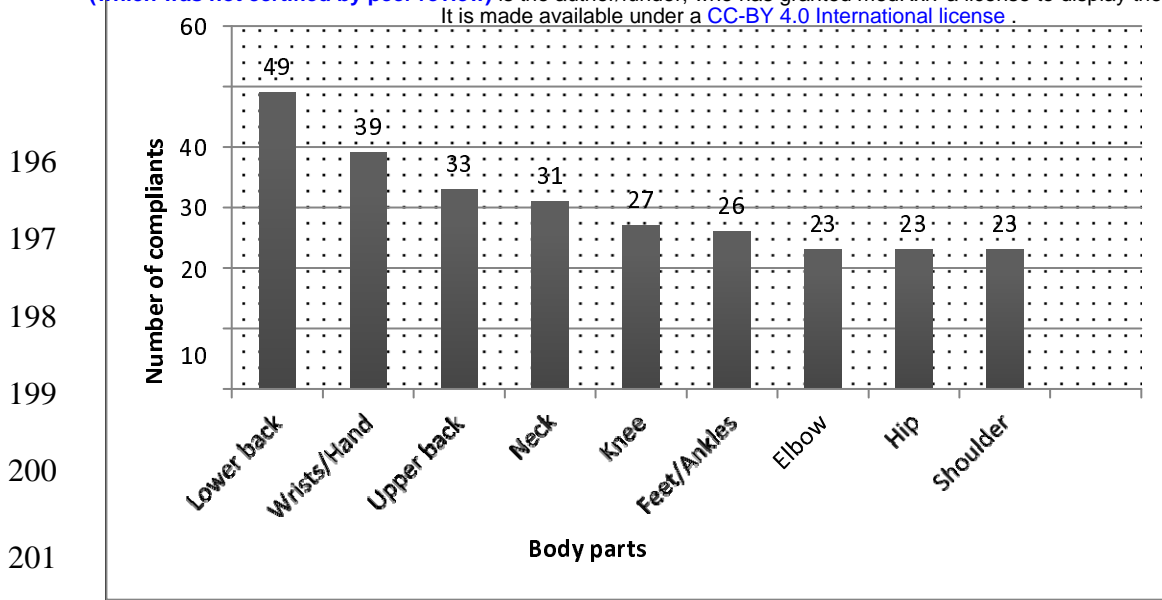

202 Figure 1. Number of body complaints among MLPs working in Bahirdar, Ethiopia, 2021

203 **Frequency of pain and discomfort within medical laboratory professionals**

204 One hundred one (42.4%) of participants took medication because of WMSDs. The most  
 205 affected was the wrist 18(7.6%) and the ankles at 16 (6.7%). The cause of the disorder that was  
 206 judged by the respondents were repetitive work 83(34.9%) and awkward posture 26(10.9%). Of  
 207 those who had disorders, 83(38.4%) suffers pain 2 to 3 times per week. Thirty-nine (16.4%) got  
 208 medication because of the disorders. Among those 25(10.5%) took 265 sick leave days that range  
 209 from 2 to 90 days with mean of 10.6 days (SD= 17.543) (Table 2).

| Variables                        | Category          | Frequency(n=238) | (%)  |
|----------------------------------|-------------------|------------------|------|
| WMSDs within a year              | Yes               | 116              | 48.7 |
|                                  | No                | 122              | 51.3 |
| Likely cause of the pain         | Repetition        | 82               | 34.5 |
|                                  | Awkward posture   | 26               | 10.9 |
|                                  | Vibration         | 5                | 2.1  |
|                                  | Static loading    | 1                | 0.4  |
|                                  | Forceful exertion | 2                | 0.8  |
| Medication for pain              | Yes               | 39               | 16.6 |
|                                  | No                | 77               | 32.3 |
| Frequency pain of WMSDs per week | 1-2               | 75               | 31.5 |
|                                  | >2                | 34               | 14.3 |
| sick leave                       | Yes               | 25               | 10.5 |
|                                  | No                | 91               | 38.1 |

210 **Magnitude distribution of WMSDs and types of health facility**

211 MLPs who are working in government-owned hospitals report the highest annual magnitude of  
 212 WMSDs 62(56.9%) followed by private hospitals 18(15.5%). Low back pain was highest among  
 213 MLPs who work in public hospitals 28(57.2%) followed by private hospitals 8(16.3%) (Table 3).

Table 3 Musculoskeletal complaints of MLPs working in Bahirdar, Ethiopia, 2021

| Type of Musculoskeletal complaint | Ownership of health facilities |                |                  |                |        |
|-----------------------------------|--------------------------------|----------------|------------------|----------------|--------|
|                                   | Gov't owned hospital           | Gov't owned HC | Private hospital | Private clinic | Others |
|                                   | N (%)                          | N (%)          | N (%)            | N (%)          | N (%)  |
| WMSDs                             | 62(56.9)                       | 16(17.8)       | 18(15.5)         | 15(12.9)       | 5(4.2) |
| Neck pain                         | 15(4.8)                        | 5(16.1)        | 5(16.1)          | 4(3.4)         | 2(1.7) |
| Shoulder pain                     | 12(51.2)                       | 5(2.2)         | 2(8.7)           | 3(13)          | 1(4.3) |
| Elbow/forearm pain                | 14 (60.9)                      | 4(17.4)        | 2(8.7)           | 3(13)          | 0(0.0) |
| Wrist/hand pain                   | 18(46.2)                       | 6(15.4)        | 5(12.8)          | 9(23.1)        | 1(2.6) |
| Upper back pain                   | 19(59.4)                       | 7(21.9)        | 2(6.3)           | 3(9.4)         | 2(6.3) |
| Lower back pain                   | 28(57.2)                       | 7(14.3)        | 8(16.3)          | 5(10.2)        | 1(2.0) |
| Hip/thigh pain                    | 10(43.5)                       | 8(34.8)        | 3(13.0)          | 1(4.3)         | 1(4.3) |
| Knees/leg pain                    | 11(40.7)                       | 4(14.8)        | 4(14.8)          | 6(22.2)        | 2(8.7) |
| Ankle pain                        | 11(42.3)                       | 6(23.0)        | 1(3.8)           | 6(23.0)        | 2(7.7) |

214 **Behavioural and individual factors of MLPs**

215 *Individual Characteristics of the medical laboratory professionals*

216 Most professionals 221(92.9%) had normal BMI (18.5-24.9kg/m<sup>2</sup>) and the mean BMI was a  
 217 mean of 1.94 (SD=0.260). 153(64.3%) professional staffs have no a habit of doing physical  
 218 exercise whereas 85(35.7%) had an experience. Of those 51(21.4%) doing physical exercise two  
 219 times per week. 15(6.3%) , 8(3.4%), 12(5.0%) laboratory staffs had medical history of systemic  
 220 illness, Symptoms related to WMSDs before engaged in this job, and were diagnosed for bone  
 221 disease respectively(Table 4).

222

Table 4 Individual characteristics of MLPs in Bahirdar, Ethiopia, 2021

| Variables                                             | Category              | N   | (%)  |
|-------------------------------------------------------|-----------------------|-----|------|
| Body mass index                                       | Underweight           | 16  | 6.7  |
|                                                       | Healthy               | 221 | 92.9 |
|                                                       | Overweight            | 1   | 0.4  |
| Regular physical exercise                             | None                  | 153 | 64.3 |
|                                                       | Two times per week    | 51  | 21.4 |
|                                                       | ≥ 3 times per week    | 34  | 14.3 |
| Medical history of systemic illness                   | Yes                   | 15  | 6.3  |
|                                                       | No                    | 223 | 93.7 |
| Symptoms related to WMSDs before engaging in this job | Yes                   | 8   | 3.4  |
|                                                       | No                    | 230 | 96.6 |
| Alcohol drinking behaviour                            | Yes                   | 48  | 20.2 |
|                                                       | No                    | 190 | 79.8 |
| Diagnosis of bone disease                             | Yes                   | 12  | 5.0  |
|                                                       | No                    | 226 | 95.0 |
| Type of Recreation                                    | Watching television   | 127 | 53.4 |
|                                                       | Reading books         | 41  | 17.2 |
|                                                       | Doing home activities | 70  | 29.4 |
| Do you ever heard about ergonomics?                   | Yes                   | 77  | 32.4 |
|                                                       | No                    | 161 | 67.6 |

## 223 Ergonomic risk practices

224 The mean of weekly working days were 5.72(SD=1.019) and the mean of weekly working hours  
225 were 47.64(SD=10.42). Specifically, more than half of Medical laboratory staff 129(54.2%), and  
226 140(58.8%) worked for more than five days and 41hours per week respectively. Furthermore,  
227 there were no working breaks other than lunchtime on regular laboratory work for one hundred  
228 forty (58.8%) medical laboratory individuals. Among the rest 66(27.7%) took a break of less  
229 than 15 minutes. One hundred thirty eight (58.0%) and 120(50.4%) respondents did highly  
230 loaded work sometimes and repetitive movements within <30 seconds respectively. One hundred  
231 thirty two (55.5%) of MLPs had overtime work. The study showed almost all 230(96.6%) of  
232 MLPs were permanently employed. 123(51.7%) respondents were work on public hospitals.  
233 Among MLPs 55(23.1%) were assigned on Parasitology and urinalysis section, 41(17.2%)  
234 Hematology, 36(15.1%) Clinical chemistry, and 62(26.1%) had miscellaneous (Table 5).

235  
236  
237  
238  
239  
240  
241  
242  
243  
244  
245  
246  
247  
248  
249  
250  
251  
252  
253  
254  
255  
256  
257  
258  
259  
260  
261

Table 5 Workplace characteristics of MLPs working in HFs of Bahirdar, Ethiopia, 2021

| <b>Variables</b>          | <b>Category</b> | <b>Frequency</b> | <b>(%)</b> |
|---------------------------|-----------------|------------------|------------|
| working day in the week   | ≤5              | 109              | 45.8       |
|                           | >5              | 129              | 54.2       |
| working hours in the week | <40             | 98               | 41.2       |
|                           | ≥40             | 140              | 58.8       |

|                                                |                             |     |      |
|------------------------------------------------|-----------------------------|-----|------|
| Presence of working breaks excluding lunchtime | No                          | 140 | 58.8 |
|                                                | ≤ 15 minutes                | 66  | 27.7 |
|                                                | >15 minutes                 | 32  | 13.4 |
| Doing high-loaded work                         | never                       | 14  | 5.9  |
|                                                | sometimes                   | 138 | 58.0 |
|                                                | always                      | 86  | 36.1 |
| Repetitive movement within < 30 seconds        | never                       | 31  | 13.0 |
|                                                | sometimes                   | 120 | 50.4 |
|                                                | always                      | 87  | 36.6 |
| Number of hours in overtime work per week      | No                          | 106 | 44.5 |
|                                                | 1-15                        | 82  | 34.5 |
|                                                | 16-30                       | 41  | 17.2 |
|                                                | 31-45                       | 9   | 3.8  |
| Rest between overtime work                     | No                          | 76  | 31.9 |
|                                                | 4-16                        | 36  | 15.1 |
|                                                | 17-28                       | 12  | 5.0  |
|                                                | 29-40                       | 5   | 2.3  |
|                                                | >40                         | 3   | 1.3  |
| Hours spent in second job per day              | No                          | 172 | 72.2 |
|                                                | 1-5                         | 45  | 18.9 |
|                                                | 6-10                        | 18  | 7.6  |
|                                                | >10                         | 3   | 1.3  |
| Number of hours in housework                   | No                          | 50  | 21.0 |
|                                                | 1-4                         | 118 | 49.8 |
|                                                | 5-8                         | 65  | 27.3 |
|                                                | 9-12                        | 5   | 2.1  |
| Number of hours carrying children <5           | No                          | 126 | 52.9 |
|                                                | 1-4                         | 76  | 31.6 |
|                                                | 5-8                         | 33  | 13.9 |
|                                                | 9-12                        | 3   | 1.3  |
| Employment status                              | Contract                    | 8   | 3.4  |
|                                                | Permanent                   | 230 | 96.6 |
| Status of health facility                      | Public hospital             | 123 | 51.7 |
|                                                | Public health center        | 30  | 12.6 |
|                                                | Private hospital            | 38  | 16.0 |
|                                                | Private clinic              | 32  | 13.4 |
|                                                | Others                      | 15  | 6.3  |
| Section of laboratory dept.                    | Clinical chemistry          | 36  | 15.1 |
|                                                | Hematology                  | 41  | 17.2 |
|                                                | Bacteriology                | 20  | 8.4  |
|                                                | Parasitology and urinalysis | 55  | 23.1 |
|                                                | ART laboratory              | 8   | 3.4  |
|                                                | Blood bank                  | 16  | 6.7  |
|                                                | Miscellaneous               | 62  | 26.1 |
| Workstations of MLPs                           | Standing bench              | 34  | 14.3 |
|                                                | Seating bench               | 42  | 17.6 |
|                                                | Laboratory chairs           | 28  | 11.8 |
|                                                | Microscope                  | 29  | 12.2 |
|                                                | Pipettes                    | 28  | 11.8 |
|                                                | Micromanipulation           | 11  | 4.6  |

|                            |               |     |      |
|----------------------------|---------------|-----|------|
|                            | Computer      | 53  | 22.3 |
|                            | Miscellaneous | 13  | 5.5  |
| Number of customers        | 1-35          | 13  | 13.9 |
|                            | 36-70         | 71  | 29.8 |
|                            | 71-105        | 88  | 37.0 |
|                            | >105          | 46  | 19.3 |
| Average sitting time, h/d  | 1-3           | 63  | 26.5 |
|                            | 4-6           | 150 | 63.0 |
|                            | 7-9           | 25  | 10.5 |
| Average standing time, h/d | 1-3           | 102 | 42.9 |
|                            | 4-6           | 126 | 52.9 |
|                            | 7-9           | 10  | 4.2  |
| Availability of light      | yes           | 196 | 82.4 |
|                            | no            | 42  | 17.6 |

## 262 **Logistic regression analysis of study variables**

263 Bivariate analysis of socio demographic characteristics of participants revealed marital status,  
 264 monthly salary and work experience of participants significantly associated with WMSDs.  
 265 Laboratory personnels that got a monthly salary of greater than 4500ETB had little risk of  
 266 experiencing WMSDs than those who earned less (OR, 2.451;95% CI, 1.108-5.420). The more  
 267 experienced laboratory staffs i.e. > 5 years had lesser experience WMSDs than those who had <  
 268 5 years of work experience (OR, 0.063; 95% CI, 0.013-0.2975). Age (OR, 0.147; 95% CI, 0.062-  
 269 0.347) and Sex (OR, 0.975; 95% CI, 0.578-1.645) did not fit with the model of Hosmer and  
 270 Lemeshow test. Different Individual characteristics of study participants were analyzed among  
 271 them reading books as a recreation was greater than two times more likely to develop a risk of  
 272 WMSDs (OR, 2.451;95% CI, 1.108-5.420). Regular physical exercise had an association with  
 273 report of WMSDs (OR, 1.399; 95% CI, 0.821-2.381) at a significant value of 0.217. Type of  
 274  
 275 recreation, diagnosis of bone disease had no an association with reports of WMSDs (Table 6).

Table 6 Logistic regression analysis factors among MLPs in Bahirdar, Ethiopia, 2021

| Variable                          | Category        | WMSDs |                    | COR (95% CI)         | P-value             | AOR(95% CI)        | P value |
|-----------------------------------|-----------------|-------|--------------------|----------------------|---------------------|--------------------|---------|
|                                   |                 | Yes   | No                 |                      |                     |                    |         |
| Marital status                    | Widowed         | 5     | 1                  | 1                    |                     | 1                  |         |
|                                   | Single          | 72    | 63                 | 4.247 (0.483-37.325) | 0.192               | 1.167(0.594-2.291) | 0.614   |
|                                   | Married         | 38    | 59                 | 7.763(0.873-69.047)  | 0.066               | 0.141(0.013-1.523) | 0.107   |
| Monthly salary in ETB             | <4501           | 32    | 21                 | 1                    |                     | 1                  |         |
|                                   | 4501-7501       | 59    | 62                 | 0.873(0.467-1.633)   | 0.671               | 1.204(0.566-2.560) | 0.630   |
|                                   | >7501           | 25    | 33                 | 0.497(0.233-1.060)   | 0.070               | 1.172(0.424-3.245) | 0.759   |
| Work experience                   | <5 years        | 14    | 2                  | 1                    |                     | 1                  |         |
|                                   | 5-15 years      | 76    | 61                 | 0.354(0.200-0.626)   | 0.000               | 0.325(0.156-0.678) | 0.003   |
|                                   | >15 years       | 26    | 59                 | 0.063(0.013-0.297)   | 0.000               | 0.056(0.009-0.336) | 0.002   |
| Type of recreation                | Home activities | 41    | 29                 | 1                    |                     | 1                  |         |
|                                   | Watching TV     | 60    | 67                 | 1.579(0.876-2.847)   | 0.129               | 1.146(0.574-2.288) | 0.700   |
|                                   | Reading books   | 15    | 26                 | 2.451(1.108-5.420)   | 0.027               | 2.348(0.957-5.760) | 0.062   |
| Regular physical exercise         | No              | 70    | 83                 | 1                    |                     | 1                  |         |
|                                   | Yes             | 46    | 39                 | 1.399(0.821-2.381)   | 0.217               | 0.550(0.292-1.037) | 0.065   |
| Repetitive movement within < 30 s | Never           | 12    | 19                 | 1                    |                     | 1                  |         |
|                                   | Sometimes       | 54    | 66                 | 0.467(0.202-1.081)   | 0.075               | 0.980(0.397-2.418) | 0.965   |
|                                   | always          | 50    | 37                 | 0.772(0.344-1.730)   | 0.530               | 1.020(0.385-2.702) | 0.969   |
| Laboratory section                | Cl. Chemistry   | 10    | 26                 | 1                    |                     | 1                  |         |
|                                   | Haematology     | 20    | 21                 | 0.256(0.081-0.813)   | 0.021               | 0.463(0.157-1.369) | 0.164   |
|                                   | Bacteriology    | 12    | 8                  | 0.641(0.129-3.196)   | 0.587               | 0.215(0.055-0.834) | 0.026   |
|                                   | Parasitology    | 32    | 23                 | 0.445(0.172-1.155)   | 0.096               | 0.166(0.057-0.478) | 0.001   |
|                                   | ART             | 4     | 4                  | 0.385(0.159-0.930)   | 0.034               | 0.689(0.111-4.279) | 0.689   |
|                                   | Blood bank      | 7     | 9                  | 0.641(0.184-2.232)   | 0.485               | 0.537(0.129-2.243) | 0.394   |
| Miscellaneous                     | 30              | 32    | 0.220(0.088-0.548) | 0.001                | 0.402(0.143 -1.125) | 0.083              |         |
| # of customers Serviced in a day  | 1-35            | 14    | 19                 | 1                    |                     | 1                  |         |
|                                   | 36-70           | 40    | 31                 | 0.571(0.248-1.316)   | 0.188               | 0.402(0.145-1.118) | 0.081   |
|                                   | 71-105          | 41    | 47                 | 0.845(0.377-1.894)   | 0.682               | 0.626(0.232-1.685) | 0.354   |
|                                   | >105            | 21    | 25                 | 0.877(0.356-2.161)   | 0                   | 0.434(0.144-1.308) | 0.138   |
| Average standing time, h/d        | 1-3             | 49    | 53                 | 1                    |                     | 1                  |         |
|                                   | 4-6             | 59    | 67                 | 0.231(0.047-1.142)   | 0.072               | 1.356(0.638-2.882) | 0.429   |
|                                   | 7-9             | 8     | 2                  | 1.050(0.622-1.771)   | 0.855               | 0.346(0.052-2.300) | 0.272   |
| Average sitting time, h/d         | 1-3             | 34    | 29                 | 1                    |                     | 1                  |         |
|                                   | 4-6             | 73    | 77                 | 1.237(0.686-2.231)   | 0.480               | 1.091(0.468-2.540) | 0.840   |
|                                   | 7-9             | 9     | 16                 | 2.084(0.802-5.417)   | 0.132               | 2.291(0.609-8.619) | 0.220   |

276 Ergonomic risk practice like repetitive movement of medical laboratory works within 30 seconds  
 277 and doing of high workload had significantly associated with WMSDs. On the other hand, there  
 278 was no association between variables hours for caring children younger than 5 years and report  
 279 of WMSDs. The association of report of WMSDs and overtime work, regular housework, rest  
 280 between regular laboratory tasks, and secondary work did not fit with the Hosmer and  
 281 Lemeshow test model.

282 The medical laboratory work place also analyzed on the current study. Many laboratory sections  
 283 had a negative association with reports of the outcome variable. MLPs working in sections of

284 laboratory like Hematology, Parasitology & urinalysis, ART and miscellaneous, and were found  
285 lower risk of WMSDs. Whereas there was significant association between number of customers  
286 serviced in a day, average standing time, and average sitting time, with WMSDs. There was no a  
287 significant association between status of the health facility, and main workstation. The  
288 association of report of WMSDs and availability of light did not fit with the Hosmer and  
289 Lemeshow test model.

290 To minimize confounders adjusted odds ratio was necessary. To analyze well, only variables  
291 with  $p < 0.25$  in the bivariate analysis were calculated in the multiple logistic regression analysis.  
292 Work tincture and section of laboratory had a significant association with WMSDs after  
293 analyzed using multivariate analysis.

294 Laboratory personnels whose work experience greater than ranged from 5-15 years (AOR, 0.325;  
295 95% CI, (0.156-0.678) and  $\geq 15$  years (AOR, 0.05; 95% CI, (0.009-0.336) with significance  
296 value of 0.003 and 0.002 respectively, which had less chance of developing WMSDs. Sections of  
297 laboratory such as bacteriology and parasitology and urinalysis had AOR of (AOR, 0.215; 95%  
298 CI, (0.055- 0.834) and (AOR, 0.166; 95% CI, (0.057- 0.478) respectively that implies MLPs who  
299 served in listed sections had less risk of WMSDs. Marital status, monthly salary, type of  
300 recreation, regular physical exercise, repetitive movement within  $< 30$  seconds, number of  
301 customers serviced in a day, average sitting and standing time had no significant association with  
302 work related musculoskeletal disorders (Table 6).

303 Abbreviation: ETB Ethiopian Birr, CI confidence interval, COR crude odds ratio, AOR adjusted  
304 odds ratio and 1= reference

### 305 **Awareness about ergonomics**

306 Seventy-seven (32.4%) participants reported they heard about ergonomics, and the source of  
307 information was regular education 30(12.6%) and training 26(10.9%). All who had awareness  
308 about ergonomics believe the necessity to applying the principle of ergonomics. Twenty-six  
309 (10.9%) respondents reported they exposed to biological and chemical risk majorly. Laboratory  
310 managers i.e. 15 out of 27 reported did not heard about ergonomics. The others (12 out of 25)  
311 know little about ergonomics, their source of information was from formal education (50%) and  
312 training. They reported the importance of ergonomics to grow productivity of the health facility



313 and to keep the professionals health. Nevertheless, eight managers reported there was  
 314 interventional measures took place on the work place, four of the 12 declared that there was  
 315 training about the concept. Ten (37%) managers reported that the duty of applying the principle  
 316 of ergonomics should be responsibility of MLPs and managers.

### 317 **Evaluation of Ergonomic Workstation**

318 To determine the final score, the numbers of ergonomic workstations evaluated were 156. The  
 319 mean score of less than 2.00 was scored by 54(34.6%) workstations. That clearly indicates poor  
 320 ergonomic condition. Hence, the overall mean score was 2.28; no workstation got a good status.  
 321 A mean score greater than 4.00 implies good ergonomic situation (Table 7).

Table 7 Mean score evaluation of medical laboratory workstations

| Scores            | 1        | 2        | 3        | 4       | 5       | Total Workstations   | Mean score <sup>b</sup> |
|-------------------|----------|----------|----------|---------|---------|----------------------|-------------------------|
| Workstations      | No. (%)  | No. (%)  | No. (%)  | No. (%) | No. (%) | No. (%) <sup>a</sup> |                         |
| Standing bench    | 7(25.9)  | 14(37.0) | 6(22.2)  | NA      | NA      | 27(17.3)             | 1.96                    |
| Seating bench     | 6(22.2)  | 12(44.4) | 9(33.3)  | NA      | NA      | 27(17.3)             | 2.11                    |
| Laboratory chairs | 6(22.2)  | 11(40.7) | 10(37)   | NA      | NA      | 27(17.3)             | 2.15                    |
| Microscopes       | 5(18.5)  | 15(55.5) | 5(18.5)  | 2(7.4)  | NA      | 27(17.3)             | 2.15                    |
| Pipettes          | 11(40.7) | 12(44.4) | 4(14.8)  | NA      | NA      | 27(17.3)             | 1.74                    |
| Computer          | NA       | 4(36.4)  | 6(54.5)  | 2(18.2) | NA      | 11(7.5)              | 3.09                    |
| Micromanipulation | NA       | 4(40)    | 4(40)    | 2(20)   | NA      | 10(6.4)              | 2.8                     |
| Total             | 35(23.9) | 68(46.6) | 40(31.5) | 4(2.7)  | NA      | 156(100)             | 2.28                    |

322 NA, not applicable, n=238 <sup>b</sup>poor ergonomic conditions=2.00 or lower, good ergonomic  
 323 conditions=4.00 or higher. <sup>a</sup>n= 156 respondents worked in health facilities of Bahirdar.

### 324 **General workstation**

325 The association of ergonomic hazards and WMSDs may be understated by making a good setup  
 326 of workplace for workers. <sup>16</sup> Observational method was applied to evaluate the workstation. The  
 327 parameters that we use to analyze the workstations were evenness of workstation, amount of  
 328 workspace, suitability of design of tools and equipment, working height adjustment, working  
 329 chair adjustment, the possibility to sit and rest, repetition of sustained work when twisting of the  
 330 back, neck and hand, availability of light and repetition of similar movements.

331 The observation showed that 16(59.3%) of working surface area was evenly arranged well.  
332 16(59.3%) of working space was too limited for work movements. The force needed to complete  
333 the task depends on significantly on proper design of tools and equipment. The other fact that  
334 worsens the working space was 18(66.7%) tools and equipment design was not suitable. The  
335 working height of only 14(51.9%) tables was correctly fit with the workers body condition.  
336 19(70.4%) of professionals had a possibility to sit and rest.

337 Among twenty-seven medical laboratory professionals that participated in the study 24(88.9%)  
338 were on sustained work while their back was mildly flexed forward. 22(81.5%) of study  
339 participants were perform their repeated work in uncomfortable hand positions. 26(96.3%) study  
340 participants were work on sustained work when their arm reaches forward without support.  
341 Furthermore, 25(92.6%) study participants work similar work movements repeatedly.

#### 342 **Standing and Sitting Workstations**

343 A total of 27 standing benches were assessed among them none of them had anti-fatigue  
344 matting, all laboratory benches were fixed, the height of 16(59%) laboratory benches fitted with  
345 workers, 17(62.9%) benches had ample leg room, 5(18.5%) benches has contact stressor, 25  
346 (92.6%) workstations had no rounded padded edges to reduce contact stress and 24(88.8%)  
347 MLPs had necessary materials around their arm's reach averagely expected within 11 inches.  
348 Twenty-seven seating benches were observed. Forty of them (51.9%) had cut outs usable for  
349 seated workers.

#### 350 **Computer workstation**

351 Totally 27 health facility workstations were assessed. 11(40.7%) health facilities has computer  
352 workstations among them 7(63.6%) were private health facilities. 8(72.7%) computer  
353 workstations had adjustable seats and back support. All computer work stations has ample leg  
354 room, only 3(27.2%) seats had foot rest provided, 3(27.2%) computer monitors are out of arm  
355 distance, 3(27.2%) computer workstation tables are not at recommended height. 6(22.2%)  
356 workstations had a computer monitor at an arm distance. Nineteen (70.4%) workstations had not  
357 ample room to accommodate a keyboard and a computer mouse to make employees to rest their  
358 side and forearms parallel to the floor. None of them had glare screens on the monitors.

359 **Microscope workstation**

360 Among medical laboratory professionals who were on microscopy workstation, five out of 27  
361 had rounded chair. 23 (85%) laboratory professionals has excessive neck flexion (>25 degree).  
362 Microscopy workstations have no contact stressor between sharp edges and the forearms. 13  
363 (48%) microscopies are pulled out to the end of the workbench to make the work easier, none of  
364 the workstations had armrests or padding and 16(59%) workstations had sufficient leg room and  
365 professionals rest their feet on laboratory stool as a support.

366 **Chair workstation**

367 Totally 27 laboratory chairs were assessed; the number of chairs which had adjustable height and  
368 backrests was 15(55.6%). A chair with footrest support was 20(70.0%). In addition, chairs that  
369 had adjustable armrests that may be removed if they made an obstacle were 21(77.8%).

370 **Pipette workstation**

371 The other workstation assessed was pipette. The numbers of pipette workstations were 27.  
372 Almost all workstations 26(95%) were used routine pipetting by single manual pipette. 14 MLPs  
373 were observed on work for more than two hours per day. One health facility uses multichannel  
374 pipettes and works more than 4 hours a day. Five (18.5%) laboratory professionals worked in  
375 neutral position with a relaxed arm, wrist and shoulder.

376 **Micromanipulation**

377 Eighty eight percent of the time (7 of 8 times) workstations were performed micromanipulations  
378 like decapping and capping tubes easily.

379

## 380 Discussion

381 WMSDs and ergonomic risk factors in medical laboratory department of health institutions were  
382 source of negative effect on workers' quality of life, capacity of productivity, pattern of  
383 absenteeism, and disabilities on body parts.<sup>17</sup> One of the least investigated concepts in Ethiopia  
384 is the distribution of WMSDs among medical laboratory personals. The result implies that  
385 among MLPs, currently WMSDs are the precedence occupational related factor in Ethiopia. The  
386 current study tried to assess the magnitude of WMSDs and ergonomic risk practice among MLPs  
387 working in Bahirdar health facilities, Ethiopia from February 1, 2021 to June 30, 2021.

388 The study revealed the magnitude of WMSDs within 12 months was (48.7%) which in line with  
389 studies conducted in Addis Abeba (49.4%) among MLPs.<sup>11</sup> and study among adults in Ethiopia  
390 35% to 74.5%.<sup>18</sup> Rebelliously, the magnitude of the study finding is greater than the study done  
391 among MLPs in Nigeria (34.5%).<sup>17</sup>, MLPs in India (18%).<sup>19</sup> and WMSDs in industry workers  
392 of Iran (36%).<sup>20</sup> The results of the investigation had lower magnitude than two studies in India  
393 (66.9%).<sup>21</sup> and (100%).<sup>22</sup>, another study in Saudi Arabia (82%).<sup>7</sup> The variation could be  
394 because of disparity in demographic difference and the difference in study setting.

395 The specific body parts have been affected more were lower back 49(20.6%), wrists/hands  
396 39(16.4%) and upper back 33(13.9%). This study was lower than two studies of Saudi Arabia  
397 among laboratory workers were lower back (61%), upper back (44%) and also wrists/hands  
398 (34%) and the second study with a magnitude of shoulders (33.5%), low back (27.5%), upper  
399 back (26.5%), and neck (23.0%) respectively.<sup>7, 23</sup> The pain magnitude from India were back  
400 pain (53%), neck (39%), wrist (21%), shoulder (21%), heel (14%) & knee (10%).<sup>24</sup> Among  
401 office workers of Nigerian hospitals were low back (61.1%), neck (43.4%), shoulder (32.1%),  
402 upper back (31.5%), hips (30.6%), hand (26.5%), and elbow.<sup>25</sup> A possible explanation regarding  
403 the disagreement of studies might be due to socio-demographic variation and study setting.

404 In the current study, specifically lower back pain had a high magnitude of 49(20.6%). Which is  
405 comparative with studies in Nigeria healthcare workers<sup>26</sup>, and general surgeons of India.<sup>27</sup>, a  
406 review from Brazil<sup>16</sup> and medical practitioners of Saudi Arabia.<sup>28</sup> A possible explanation of the  
407 agreement between the studies may be due to the nature of the procedure that the work needs or  
408 the material design used by these health workers. On the other hand, this study finding was lower  
409 than a study done in Nigeria among health workers<sup>29</sup> and a study conducted among medical

410 laboratory staffs of Sweden determined the prevalence of lower back pain was (25 to 57%).<sup>30</sup>  
411 The difference may be due to study setting and socio economic variation.

412 Laboratory personnel whose work experience ranged from 6 to 10 years (AOR, 0.363; 95% CI,(  
413 0.181-0.726) and  $\geq 16$  years (AOR, 0.083;95% CI, (0.008-0.842) with significance value of 0.004  
414 and 0.035 respectively, had less chance of developing WMSDs when compared with work  
415 experience of 1 to 5 years. Younger professionals that had the work experience of 1 and 5 years  
416 were more exposed to WMSDs which supported by studies from India and Australia.<sup>17, 19, 31</sup>  
417 This result is also consistent with study in Saudi Arabia.<sup>7</sup> On the contrary, a study from the same  
418 country reported that medical practitioners with work tincture of 6-10 years had twice as likely  
419 as study participants with 1-5 years of experiences to develop WMSDs.<sup>28</sup>

420 Insubordinately, a study done by Agrawal *et al.* reported duration of employment had no  
421 association with occurrence of WMSDs.<sup>19</sup> On the other side, a study conducted among Iranian  
422 health workers reported no association between problems of WMSDs and work experience.<sup>32</sup> In  
423 other words, WMSDs may meaningfully relate with medical laboratory work experience, lack of  
424 training, lack of systematic working habit. In addition, this may be because less experienced  
425 personnels may participate in work that is more technical, little experience to handle bad  
426 ergonomic conditions and exposed to high workload. As a result, a new direction of outlook  
427 could be necessary to solve the occurrence of WMSDs at early age and stages of career.

428 One of the major factors in WMSDs was sections of medical laboratory departments. This study  
429 found an association between some sections of laboratory and WMSDs. Laboratory staffs that  
430 were in sections like bacteriology (AOR, 0.218; 95% CI, (0.065- 0.727), and parasitology and  
431 urinalysis (AOR, 0.384; 95% CI, (0.152- 0.974) had lesser risk of WMSDs. The lesser risk may  
432 be due to lower workload and in the parasitology and urinalysis section there is more movements  
433 to process and reject samples that may decrease poor posture at work, repetitive movements, and  
434 presence of working shifts. The association of the above-listed sections of clinical laboratory and  
435 WMSDs was generally concur with similar studies in Addis Ababa.<sup>11</sup> The reason for the  
436 agreement might be due to socio-demographic similarities and evaluation tools used.

437 Based on the current study, awareness about ergonomics had a less likely association with  
438 WMSDs. Among 238 MLPs, 77(32.4%) heard about ergonomics. Which is comparable with the  
439 study in Nigeria (25.5%).<sup>2</sup> Even though, there was no updated study on the local context.

440 Ergonomic awareness of this study was greater than two studies conducted in Ethiopia, the first  
441 among MLPs 15.4% <sup>11</sup> and the second within industry workers <sup>14</sup>. The difference might be due to  
442 variations on study setting and time.

443 Nevertheless, ergonomics is new to the healthcare <sup>2</sup>, regular education and training was the major  
444 source of an information. But the worse result was half of interviewed, 15(55.6%) laboratory  
445 managers reported they had no any idea about ergonomics, which is supported by previous study  
446 findings in Ethiopia <sup>11</sup>. To get the very benefit of ergonomics, laboratory managers had no basic  
447 knowledge which leads to poor application.<sup>2</sup> Likewise, most participants' awareness of  
448 ergonomics at the workplace was unknown. <sup>3</sup> The possible explanation may be due to poor in-  
449 house training about ergonomics. <sup>2</sup> Moreover, weakness of peer teaching and orientation after  
450 taking the training. We understand that the best scheme for preventing WMSDs were to  
451 strengthen trainings about ergonomics. <sup>33</sup>

452 The major relevant issue to the occurrence of MSDs are the working posture of workers,  
453 handling of materials, movements performed repeatedly, static work and work related disorders.  
454 WMSDs mostly affect neck/shoulder and low back of the body. <sup>34</sup> When the work environment  
455 was in poor ergonomic design, which leads to awkward postures and work activities that  
456 consequently leads to biomechanical stresses on joints, muscles, and tendons. <sup>33</sup>

457 In our study, the mean score of the workstations were 2.28 that show poor ergonomic condition  
458 and a comparable study of Iran reported a mean score of 2.2. <sup>35</sup> It is contrasting with a study  
459 from Ethiopia with a mean score of 1.95. <sup>11</sup> The deviation from the study of Haile et al. could be  
460 due to set up of laboratories and production of ergonomically well-designed materials currently.

461 Accordingly, the study exposed that many conditions of standing and sitting workstations were  
462 poor with a mean score of 1.96 and 2.11 respectively. There was no antifatigue matting in any  
463 workstation, 11(40.7%) height of benches did not adjusted, 81.5% of benches had no contact  
464 stressor, 13(48.1%) seated benches had cut-out and all benches had fixed height and no  
465 supportive shoes used. It is comparable with a study by Haile *et al* in terms of the percentage of  
466 rounded edge of contact stressors, easiness of reaching materials on laboratory benches.<sup>11</sup>  
467 Likewise a study conducted in India, reported prolonged standing, the inappropriate height of  
468 tables had no association with WMSDs.<sup>19</sup> The reason for the comparability of the study may be  
469 due to the similarity of socio demographic factors.

470 Moreover, routine activities that performed in medical laboratory departments such as pipetting,  
471 microscopy, micromanipulation, and working with biosafety cabinets and non-standardized work  
472 place designs exposed MLPs to WMSDs. <sup>17, 36</sup> In our study, the number of chairs with lumbar  
473 support and adjustability features was eight (72.7%). The number of workstations without foot  
474 support was eight (72.7%). The workstations without enough space to hold monitor and mouse  
475 was 19(70.4%) that have consequently uncomfortable hand position. All workstations had no  
476 antiglare screens, which is in comparison with the study in Ethiopia reported as the laboratory  
477 chairs with adjustment feature was 43.8% <sup>11</sup>, whereas in Indian study chairs with adjustability  
478 feature was 51.6%, workstations that had no foot support were 66.7%, laboratory computers with  
479 an antiglare screens was 25.0%. <sup>19</sup> The difference might be created because of advancements in  
480 furnitures technologies in near feature, limited awareness about the importance of the materials,  
481 the necessity of the product may be decreased, example antiglare screens because of  
482 improvements on buildings.

483 The magnitude of sufficient legroom in the microscope workplace was 16(59%). In contrast, the  
484 study in India exposed 11.1% of participants on microscope workspace had no enough leg and  
485 space which directly leads to enhanced exposure of awkward posture. <sup>19</sup> Use of microscope at  
486 awkward posture for long period of time associated with WMSDs <sup>37</sup> and 23(85%) of MLPs has  
487 excessive neck flexion that significantly associated with WMSDs. <sup>28</sup> On microscopy workstation,  
488 there was no contact stressor between sharp edges and the forearm that creates WMSDs of hand  
489 and wrists. <sup>38</sup> The probable explanatory difference may be awareness variation and workplace  
490 design difference.

491 To reduce the occurrence of musculoskeletal disorders having ergonomic requirements of chairs  
492 have been very much important. <sup>19</sup> In the present study, fifty (55.6%) chairs had adjustable  
493 height and backrests, 20(70%) had foot support and 21(77.8%) had removable adjustable  
494 armrests, which is contrast with a study from Addis Ababa resulted with (20.0%) had adjustable  
495 height and backrests, 12(60.0%) had footrest support and 5(25.0%) had removable adjustable  
496 armrests. <sup>11</sup> The differences may be due to technological advancement, increment of awareness  
497 of MLPs and the buying power of health facilities. When compared with rehabilitation, golden  
498 solution to occurrence of WMSDs on workers, employers and society, is applying preventive  
499 measures by detecting potentially harmful ergonomic work situations. <sup>16</sup>

500 In the present study, 22(81.5%) MLPs working in pipette workstation did not worked in relaxed  
501 shoulder and neutral position of arms and wrists. That may cause upper back pain. Which is  
502 supported by similar previous study findings in Ethiopia that reported 86.6% of MLPs did not  
503 work in neutral position of arms and wrists and with relaxed shoulder. <sup>11</sup> This might be due to  
504 poor awareness of ergonomics and knowledge of gains of its right among MLPs. <sup>2</sup> Moreover,  
505 there are limited studies about ergonomic hazards that ultimately lead to musculoskeletal  
506 problems. <sup>3</sup> The study from India concluded that the percentage of participants with WMSD that  
507 were work on pipette in awkward posture was 6.7%. <sup>19</sup> The difference might be due to awareness  
508 about neutral position of body, the ability to provide ergonomic workstation and work setup.

509 Above all, to get effective and efficient result, health and safety MLPs at the work environment  
510 should be given utmost concern because 80% of decisions related to admission of patients to  
511 hospital, prescriptions of medication and discharges need participation of medical laboratories.<sup>39</sup>  
512 Without proper functioning of ergonomics in work place environment and tasks of medical  
513 laboratories, the goal of health institution cannot be achieved hence the efficiency of employees  
514 decreased.<sup>2</sup> Managers' should emphasize good ergonomic design and safe working environment  
515 because physical efforts continue to cause serious damage to workers' health. <sup>1, 40</sup>

## 516 **Strengthening and Limitation of the study**

### 517 **Strength of the Study**

518 The study covers all laboratory tasks and laboratory professionals. To assure the quality of data,  
519 tools of data collection was pretesting in one of tertiary hospital in Amhara region.

### 520 **Limitation of the Study**

521 Due to different factors, this study had some limitations and reader should consider them while  
522 inferring our finding: it was limited by cross sectional nature of the study design. The same is  
523 true for related studies; it might be difficult to distinguish between WMSDs and musculoskeletal  
524 disorders of other causes for MLPs.



## 525 **Conclusion and Recommendations**

526 The finding of this study confirms, about half of the study participants, one hundred sixteen  
527 (48.7%) MLPs suffered from WMSDs and majority was from public hospitals. Among them,  
528 42.4% of MLPs took medication. Of the nine body regions lower back, wrist/hand and upper  
529 back pain was the majorly affected. MLPs reported the foremost causes of WMSDs were doing  
530 the same laboratory tasks repeatedly within short period of time and awkward posture. The  
531 choice of the recreation type for 70.6% of medical laboratory staffs were watching TV and  
532 reading books. Doing physical exercise did not a part of majority MLPs lifestyle.

533 Binary logistic regression analysis revealed marital status, monthly salary, work experience,  
534 regular physical exercise, repetitive movement of works within 30 seconds, section of laboratory,  
535 number of customers served in a day, average standing time, and average sitting time were  
536 significantly associated with WMSDs. Likewise, work experience and sections of laboratory are  
537 significantly associated with WMSDs in multiple logistic regression analysis. More broad  
538 research into ergonomics and ergonomic risk practice may help to make solutions, consequently  
539 to improve the current conditions.

540 About one third 77(32.4%) of MLPs heard about ergonomics that inversely explained majority of  
541 MLPs did not aware about ergonomics at the workplace. More specifically 15(55.5%) laboratory  
542 managers did not know heard anything about ergonomics and 12(44.4%) know little about the  
543 concept and 37% of managers reported that the duty of applying ergonomics principle should be  
544 obligation of MLPs and managers. Training and orientation about causes of WMSDs for  
545 especially less experienced MLPs to adopt preventive measures is so urgent.

546 The workstations scored of standing bench, seating bench, laboratory chairs, Microscopes,  
547 pipettes, computer and micromanipulation were noncompliance. The final overall score was  
548 2.28, which showed poor ergonomic workstation. To decrease WMSDs, laboratory workplace  
549 setup takes priority. It is essential to make modification of tools and equipments to fit with the  
550 body nature of MLPs. We expect our research call the need of action on the matter of causes of  
551 WMSDs among MLPs of Ethiopia.

## 552 **Acknowledgments**

553 We thank all health facilities' and MLPs for participating in the study.

554 **Authors' contributions**

555 Mekuriaw Temeche Albsew is the principal author, and contributed to methodology, data  
556 collection, data analysis, manuscript preparation and review, appraisal and editing.

557 Abay Sisay Misganaw contributed to research idea conception, methodology and manuscript  
558 review, appraisal and editing.

559 Melashu Balew Shiferaw contributed to methodology and data collection

560 Habtamu Molla contributed to methodology and data collection

561 We read and approved the final manuscript.

562 **Funding**

563 This work was supported by Addis Ababa University. However, the funder had not any  
564 involvement with the research methodology design, analysis and write up of the manuscript.

565 **Ethical considerations**

566 To do the study, ethical clearance was obtained from DRERC (department research and ethical  
567 review committee) of Addis Abeba University, college of health science with a protocol number  
568 of DRERC/618/21/MLS. During data collection, oral consent was obtained from study  
569 participants by explaining the aim and purpose of the study and their rights.

570 **Declaration of conflicting interests**

571 The author(s) declared no potential conflicts of interest with respect to the research, authorship,  
572 and/or publication of this article

573 **Data Availability statement**

574 All data produced in the present work are contained in the manuscript

575 **Reference**

576 1. Shaik AR, Sripathi RBH, Husain A. Correlation between Ergonomic Risk Factors and  
577 Work-Related Musculoskeletal Disorders in Dental Surgeons. IJHSR. 2016;6(12).

- 578 2. Oladeinde BH, Ekejindu IM, Omoregie R, Aguh OD. Awareness and knowledge of  
579 ergonomics among Medical Laboratory Scientists in Nigeria. *Ann Med Health Sci Res*  
580 2015;5:423-7.
- 581 3. Mukhtad AA, Aminese HA, Mansor MA, Mansour HS, Elmesmary HA. Ergonomic Risk  
582 Assessment among Healthcare Laboratory Technicians in Benghazi Medical Centre  
583 *IJARnD*. 2018;3(3).
- 584 4. Aghahi RH, Darabi R, Hashemipour MA. . Neck, back, and shoulder pains and  
585 ergonomic factors among dental students. *J Edu Health Promot*. 2018;7(40).
- 586 5. Patel H, Pandya U. Prevalence of Neck Pain in Laboratory Technicians. *J Nov*  
587 *Physiother*. 2017;7(340).
- 588 6. Chia SJG, Feng MSY, Hoe GW. Musculoskeletal Disorders among Medical  
589 Technologists in a Tertiary Hospital. . *J Ergonomics*. 2020;10(271).
- 590 7. AlNekhlan AF, Khoshakhlagh AH, AlAqeel BY, AlHawery AA, AlFadhel S, Masuadi  
591 E Work-related musculoskeletal disorders among clinical laboratory workers. *Avicenna J*  
592 *Med*. 2020;10:29-34.
- 593 8. Shiferaw MB, Sisay MA. Evaluation of continuous quality improvement of tuberculosis  
594 and HIV diagnostic services in Amhara Public Health Institute, Ethiopia. *PLoS One*.  
595 2020;15(3):e0230532.
- 596 9. Bongers PM, Kremer AM, ter Laak J. Are psychosocial factors risk factors for  
597 symptoms and signs of the shoulder, elbow, or hand/wrist? A review of the  
598 epidemiological literature. *Am J Ind Med*. 2002;41:315-42.
- 599 10. Stanton N, Hedge A, Brookhuis K, Salas E, Hendrick H. *Handbook of Human Factors*  
600 *and Ergonomics Methods* 2005.
- 601 11. Haile LE, Taye B, Hussen F. Ergonomic Workstations and Work-Related  
602 Musculoskeletal Disorders in the Clinical Laboratory. *Lab Med*. 2012 43(Suppl 2):e11-e9
- 603 12. Eshetu LH. Evaluation of Hospital Laboratories Design in Ethiopia. *Int J Ind Ergon*.  
604 2017;1(41):000115.
- 605 13. Temesgen K, Aycheh MW, Leshargie C. Job satisfaction and associated factors among  
606 health professionals working at Western Amhara Region, Ethiopia. *Health Qual Life*  
607 *Outcomes*. 2018;16(65 ).

- 608 14. Girma Z. Assessing the prevalence of work related musculoskeletal disorders and  
609 associated factors among workers in selected garments in Addis Abeba, Ethiopia. Addis  
610 Abeba: Addis Abeba university; 2016.
- 611 15. Bedru W, Tefera Y, Wakuma S. Self-Reported Work Related Musculoskeletal Disorders  
612 and Determinant Factors Of Female Beauty Salon Hair Dressers, In Addis Ababa,  
613 Ethiopia, 2016. Addis Abeba: Addis Ababa University; 2016.
- 614 16. Soares CO, Pereira BF, Gomes MVP, Marcondes LP, Gomes FC, de Melo-Neto.  
615 Preventive factors against work-related musculoskeletal disorders: narrative review JS  
616 Rev Bras Med Trab. 2019;17(3):415-30.
- 617 17. Penkala S, El-Debal H, Coxon K. Work-related musculoskeletal problems related to  
618 laboratory training in university medical science students: a cross sectional survey. BMC  
619 Public Health. 2018;18(1208).
- 620 18. Gebreyesus T, Nigussie K, Moges GG, Janakiraman B. The prevalence and risk factors  
621 of work-related musculoskeletal disorders among adults in Ethiopia: a systematic review.  
622 BMC Eco. 2020;9(136).
- 623 19. Agrawal PR, Kamath V, MaiyaAG, Kamath A. Risk factors for work-related  
624 musculoskeletal disorders among medical laboratories professionals. IJMSPH.  
625 2016;6(3):531.
- 626 20. Ahmadi A, Mirzaei R, Ansari H. Assessment of work postures and prevalence of  
627 musculoskeletal disorders among porcelain industry workers JOHE. 2015;4(3).
- 628 21. Maulik S, Iqbal R. Occupational health and musculoskeletal symptoms among Indian  
629 Medical Laboratory technicians. JOHE. 2015;2(3).
- 630 22. Ganjave P, Shikrapurkar S. Prevalence of Neck Pain among Clinical Laboratory  
631 Technicians in Mumbai. IJHSR. 2019;9(6).
- 632 23. El-Helaly M, Elsherbeny E, Haji A, Assiri M, Fadlelmula A. Reported musculoskeletal  
633 symptoms among laboratory workers, in relation to individual and work-related physical  
634 factors. Egypt J Occup Med. 2018; 42(42):79-92.
- 635 24. Arora A, Uparkar SM. Ergonomic risk assessment in pathology laboratory technicians.  
636 IJTRR 2015;4(3):15-9.
- 637 25. Ayanniyi O, Nudamajo OS, Mbada CE. Pattern of work-related musculoskeletal  
638 disorders among Nigerian Hospital workers. J Environ Occup Sci. 2016;5(41).

- 639 26. Ganiyu SO, Olabode JA, Stanley MM, Muhammad I. Patterns of occurrence of work-  
640 related musculoskeletal disorders and its correlation with ergonomic hazards among  
641 health care professionals. *Niger J Exp Clin Biosci*. 2015;3 (42).
- 642 27. Ali SM, Hamid M, Rana S, Parveen S, Ali A, Naz S. Prevalance of work related low  
643 backache in general surgeons. *Med J South Punjab*. 2021;2(41):7-12.
- 644 28. Alwabli Y, Almatroudi MA, Alharbi MA, Alharbi MY, Alreshood S, Althwiny FA.  
645 Work-Related Musculoskeletal Disorders Among Medical Practitioners in the Hospitals  
646 of Al'Qassim Region, Saudi Arabia. *Cureus* 2020;12(5):e8382.
- 647 29. Chinonyelum IE, Ifeyinwa NE, Ngozika US, Reginald OO, Daniel MI, Olatunbosun. A  
648 Work-related musculoskeletal disorder among health workers: a cross-sectional survey of  
649 National Orthopaedic Hospital, Enugu. *JSci Res Stud*. 2017;4(11318-332).
- 650 30. Björkstén MG, Almby B, Jansson ES. Hand and shoulder ailments among laboratory  
651 technicians using modern plunger-operated pipettes. *Appl Ergon*. 1994;25:88-94.
- 652 31. Yasobant S, Rajkumar P. Work-related musculoskeletal disorders among health care  
653 professionals: A cross-sectional assessment of risk factors in a tertiary hospital, India.  
654 *Indian J Occup Environ Med*. 2014;182(75-81).
- 655 32. Mirmohammadia S, Yazdanib J, Etemadinejad S, Asgarinejadd H. A cross-sectional  
656 study on work-related musculoskeletal disorders and associated risk factors among  
657 hospital health cares. *Procedia Manuf*. 2015 3(4528 - 4534).
- 658 33. Price JW. Osteopathic model of the development and prevention of occupational  
659 musculoskeletal disorders. *J Osteopath Med* 2021;121(3):287-305.
- 660 34. Grooten WJA, Johanssons E. Observational Methods for Assessing Ergonomic Risks for  
661 Work-Related Musculoskeletal Disorders. A Scoping Review. *Rev Cienc Salud*. 2018;16.
- 662 35. Choobineh AR, Tourani S, Heidarian K, et al. Ergonomic workstation evaluation in  
663 clinical laboratories of KUMS and its relationship to musculoskeletal problems and  
664 productivity In: Proceedings of the 3<sup>rd</sup> International Cyberspace Conference on  
665 Ergonomics, 2002 South Africa. International Ergonomics Association Press. 2002:421-  
666 34.
- 667 36. Yazdanirad S, Habibi E, Habibi E, Zare A, Zeinodini M, Dehghani F. Comparing the  
668 effectiveness of three ergonomic risk assessment methods-RULA, LUBA, and NERPA-

- 669 to predict the upper extremity musculoskeletal disorders. *Indian J Occup Environ Med.*  
670 2018;22:17-21.
- 671 37. George E. Occupational hazard for pathologists: microscope use and musculoskeletal  
672 disorders. *Am J Clin Pathol.* 2010;133(4):543-8.
- 673 38. Darragh AR, Harrison H, Kenny S. Effect of an ergonomics intervention on workstations  
674 of microscope workers. *Am J Occup Ther.* 2008;62(41):61-9.
- 675 39. Gebreyes M, Sisay A, Tegen D, Asnake A, Wolde M. Evaluation of Laboratory  
676 Performance, Associated Factors and Staff Awareness Towards Achieving Turnaround  
677 Time in Tertiary Hospitals, Ethiopia. *Ethiop J Health Sci.* 2020;30(5).
- 678 40. Lo´pez-García JR, García-Herrero S, Gutiérrez JM, Mariscal MA. Psychosocial and  
679 Ergonomic Conditions at Work: Influence on the Probability of a Workplace Accident.  
680 *Biomed Res Int.* 2019;13:1-4
